# Supplementary material for: Highly-efficient Ru/Al–SBA-15 catalysts with strong Lewis acid sites for the water-assisted hydrogenation of p-phthalic acid
Source: Royal Society of Chemistry journal article supplement (doi:10.1039/d0cy00047g), 2020-01-01
Supplement: d0cy00047g1.pdf [file d0cy00047g1.pdf]

## Supporting Information (SI):

# Highly-efficient Ru/Al-SBA-15 Catalysts with Strong Lewis Acid Sites for the Water-assisted Hydrogenation of *p*-Phthalic Acid

Cong Mao<sup>a</sup>, Jingwei Zheng<sup>a</sup>, Babasaheb M. Matsagar<sup>b</sup>, Ranjith Kumar Kankala<sup>a</sup>, Tansir Ahamad<sup>c</sup>,  
Yucheng Yang<sup>a</sup>, Kevin C.-W. Wu<sup>b</sup>, Xueqin Zhang<sup>a,\*</sup>

<sup>a</sup>*College of Chemical Engineering, Huaqiao University, Xiamen, 361021, Fujian, China*

<sup>b</sup>*Department of Chemical Engineering, National Taiwan University, Taipei 10617, Taiwan*

<sup>c</sup>*Department of Chemistry, College of Science, King Saud University, Riyadh 11451, Saudi Arabia*

*\* Corresponding author at:*

*College of Chemical Engineering, Huaqiao University, Xiamen 361021, PR China.*

E-mail: [xqzhang2009@hqu.edu.cn](mailto:xqzhang2009@hqu.edu.cn) (X. Q. Zhang)

**Table S1.** *Structural parameters of supports (SBA-15, AS-x).*

| Entry | Supports | $S_{\text{BET}}$ (m <sup>2</sup> /g) | $D_p$ (nm) | V (cm <sup>3</sup> /g) |
|-------|----------|--------------------------------------|------------|------------------------|
| 1     | SBA-15   | 640                                  | 6.6        | 1.03                   |
| 2     | AS-50    | 827                                  | 6.5        | 0.89                   |
| 3     | AS-10    | 744                                  | 6.6        | 0.89                   |
| 4     | AS-3     | 611                                  | 6.5        | 0.85                   |
| 5     | AS-1     | 499                                  | 6.5        | 0.76                   |
| 6     | AS-0.5   | 365                                  | 6.5        | 0.55                   |

**Table S2.** *The amounts of acid sites determined by pyridine-FTIR.*

| Catalyst  | The amounts of acid sites (umol/g) |       |       |        |      |       |
|-----------|------------------------------------|-------|-------|--------|------|-------|
|           | 150 °C                             |       |       | 400 °C |      |       |
|           | B                                  | L     | Total | B      | L    | Total |
| Ru/SBA-15 | 2.8                                | 35.8  | 38.6  | 0.9    | 2.6  | 3.5   |
| Ru/AS-50  | 4.0                                | 61.4  | 65.4  | 1.3    | 27.9 | 29.2  |
| Ru/AS-10  | 4.1                                | 83.4  | 87.5  | 1.4    | 49.4 | 50.8  |
| Ru/AS-3   | 3.5                                | 160.1 | 163.6 | 1.5    | 81.1 | 82.6  |
| Ru/AS-1   | 2.7                                | 92.7  | 95.4  | 1.7    | 33.7 | 35.4  |
| Ru/AS-0.5 | 1.7                                | 86.5  | 88.2  | 1.0    | 26.4 | 27.4  |

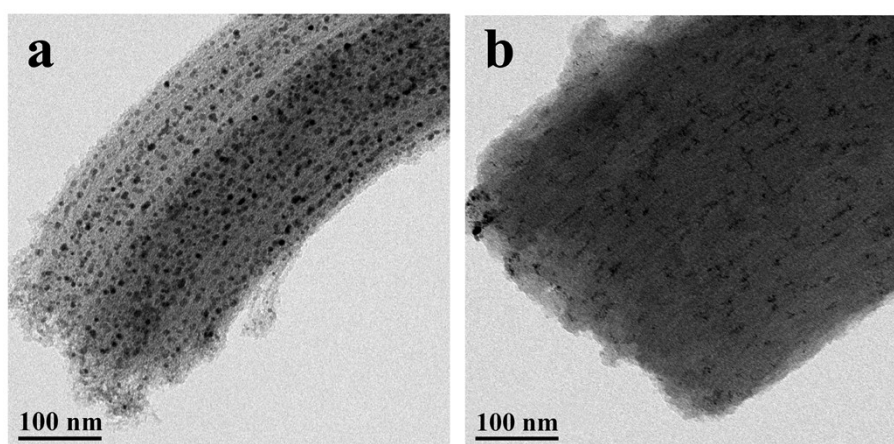**Fig. S1.** TEM images of (a) Ru/AS-3 and (b) Ru/AS-3-U (U refers to used catalyst for fourteen times).



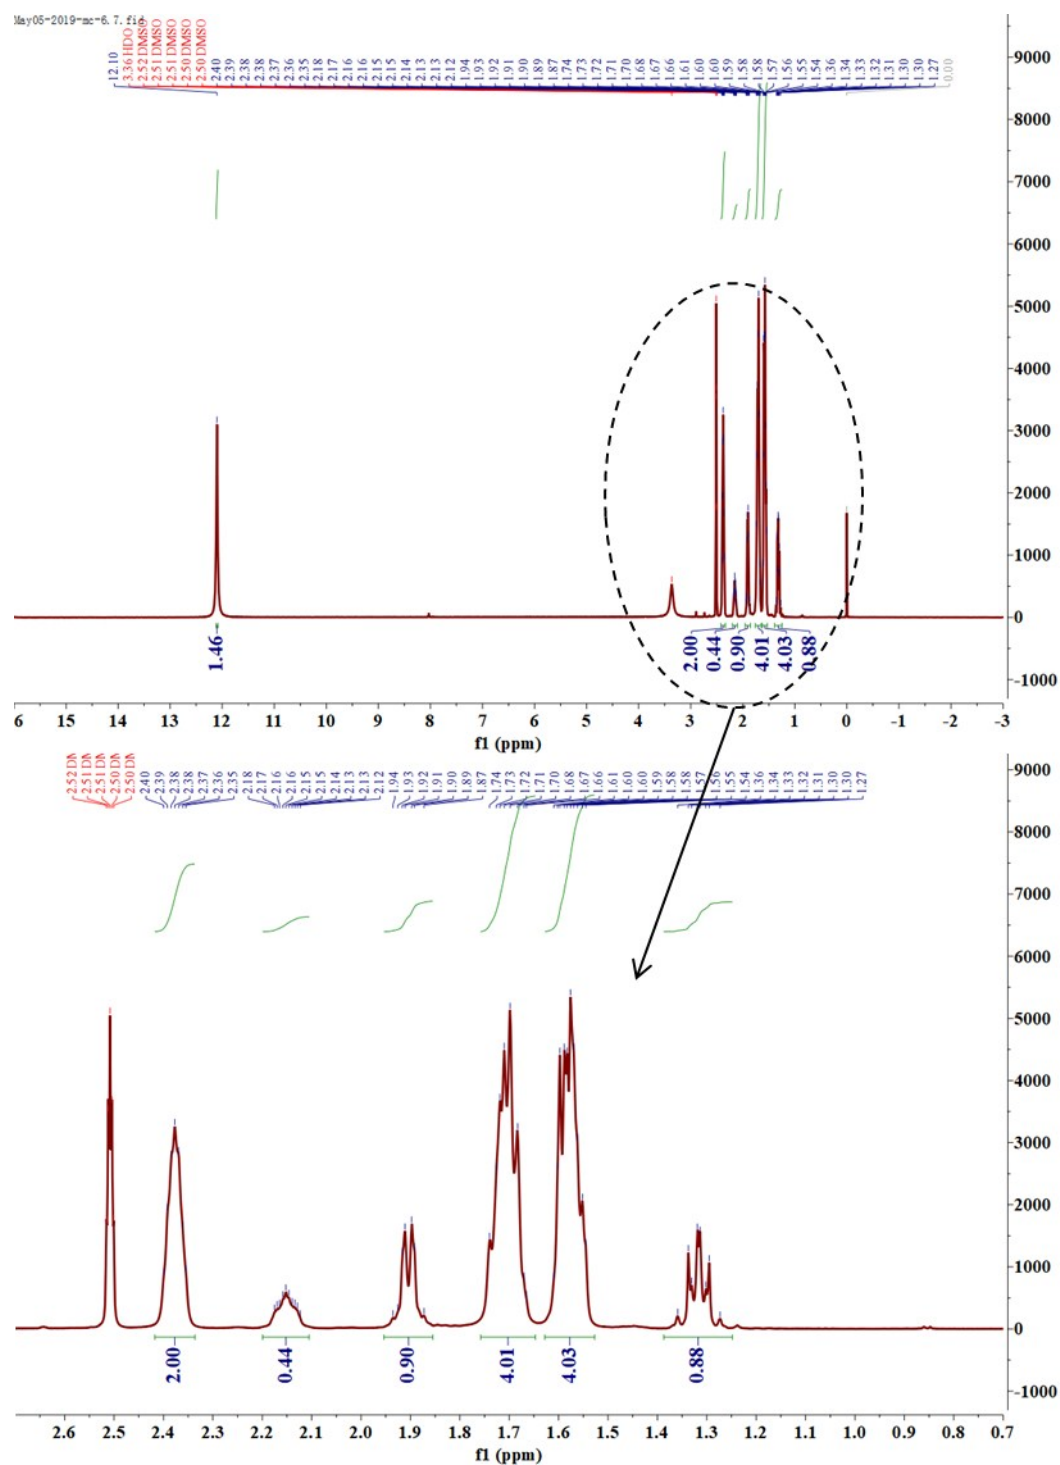

**Fig. S3.**  $^1\text{H}$  NMR spectra of the hydrogenation product (*p*-phthalic acid was hydrogenated in  $\text{H}_2\text{O}$  solvent for 2h). DMSO- $d_6$  was used to dissolve the product.

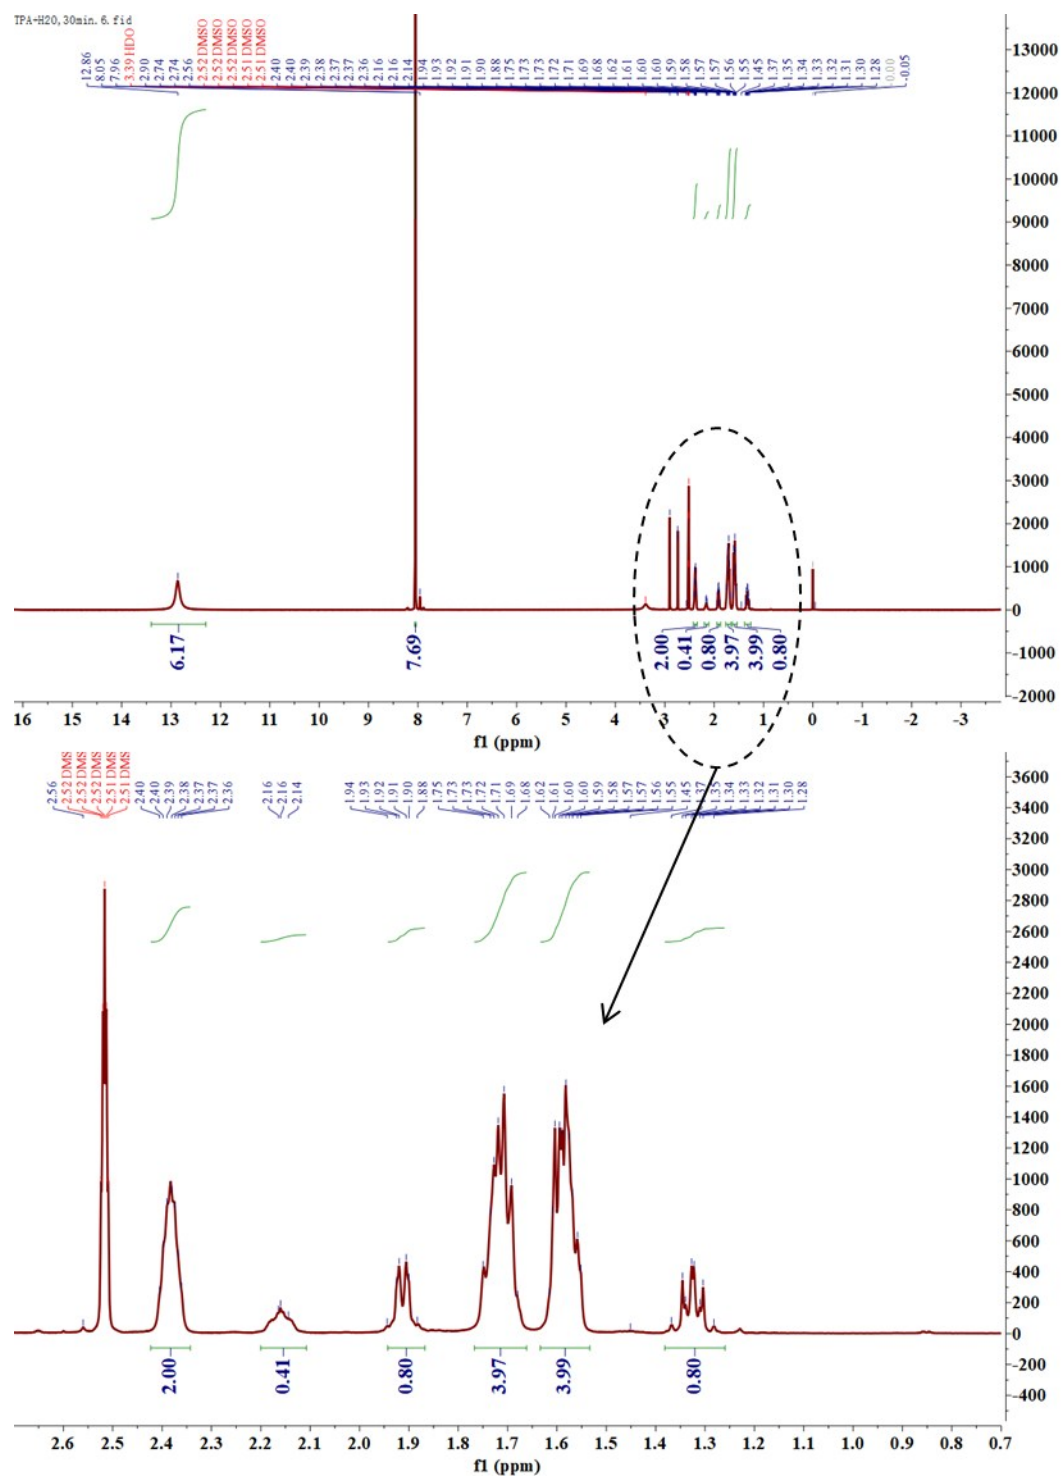

**Fig. S4.**  $^1\text{H}$  NMR spectra of the hydrogenation product (*p*-phthalic acid was hydrogenated in  $\text{H}_2\text{O}$  solvent for 10min). DMSO- $d_6$  was used to dissolve the product.

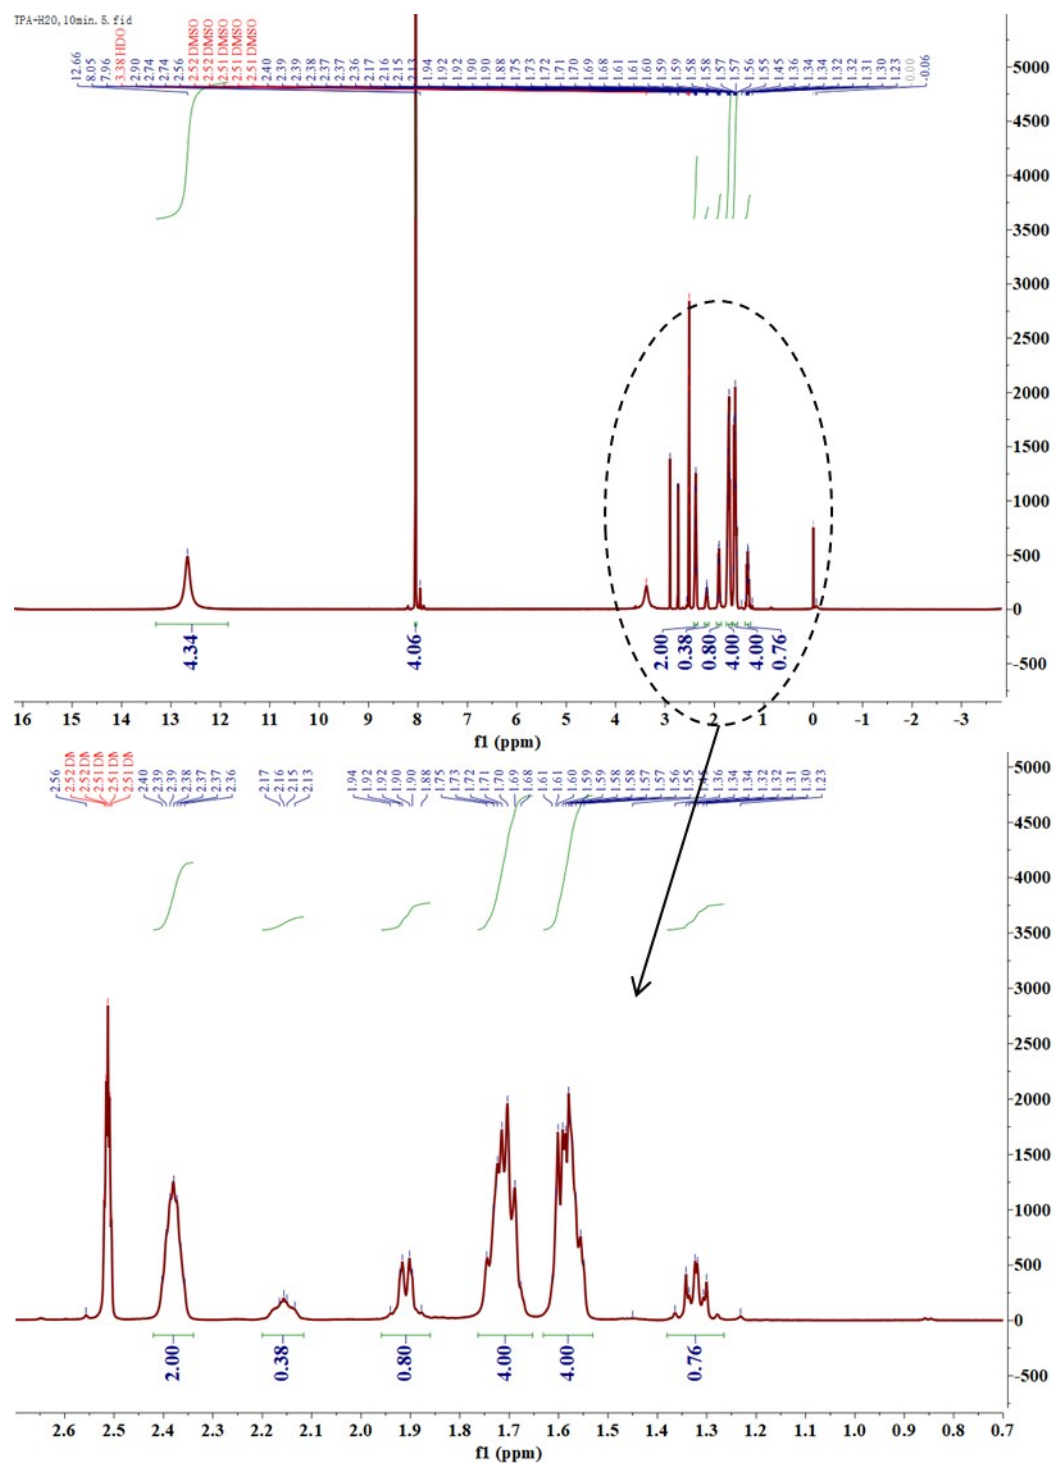

**Fig. S5.**  $^1\text{H}$  NMR spectra of the hydrogenation product (*p*-phthalic acid was hydrogenated in  $\text{H}_2\text{O}$  solvent for 30min). DMSO- $d_6$  was used to dissolve the product.

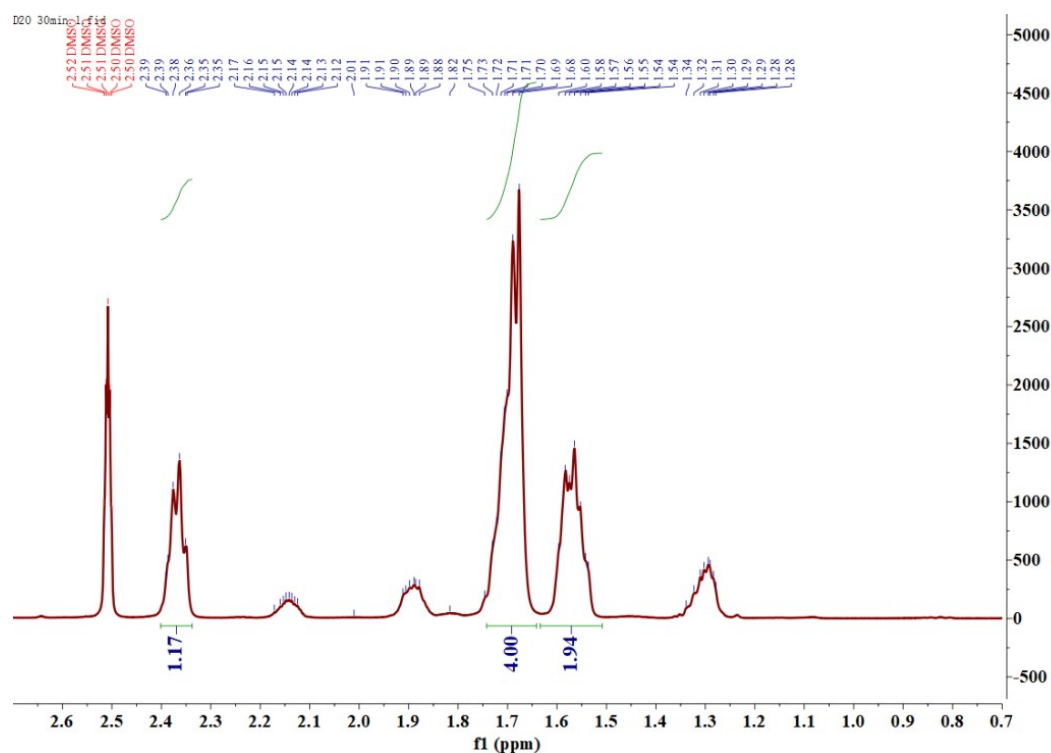

**Fig. S6.**  $^1\text{H}$  NMR spectra of the hydrogenation product (*p*-phthalic acid was hydrogenated in  $\text{D}_2\text{O}$  solvent for 2h).  $\text{DMSO-}d_6$  was used to dissolve the product.

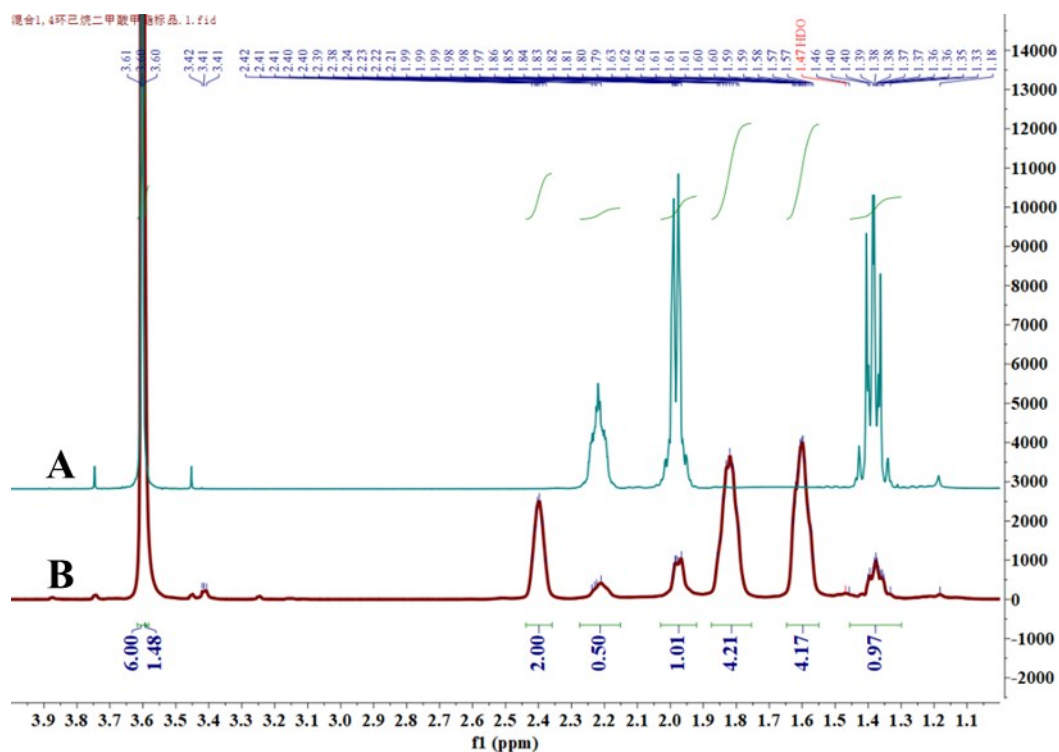

**Fig. S7.**  $^1\text{H}$  NMR spectrum of standard dimethyl 1,4-cyclohexanedicarboxylate samples. (A) *trans*-dimethyl 1,4-cyclohexanedicarboxylate and (B) *trans*- and *cis*-dimethyl 1,4-cyclohexanedicarboxylate mixture.  $\text{CDCl}_3$  was used to dissolve the product.

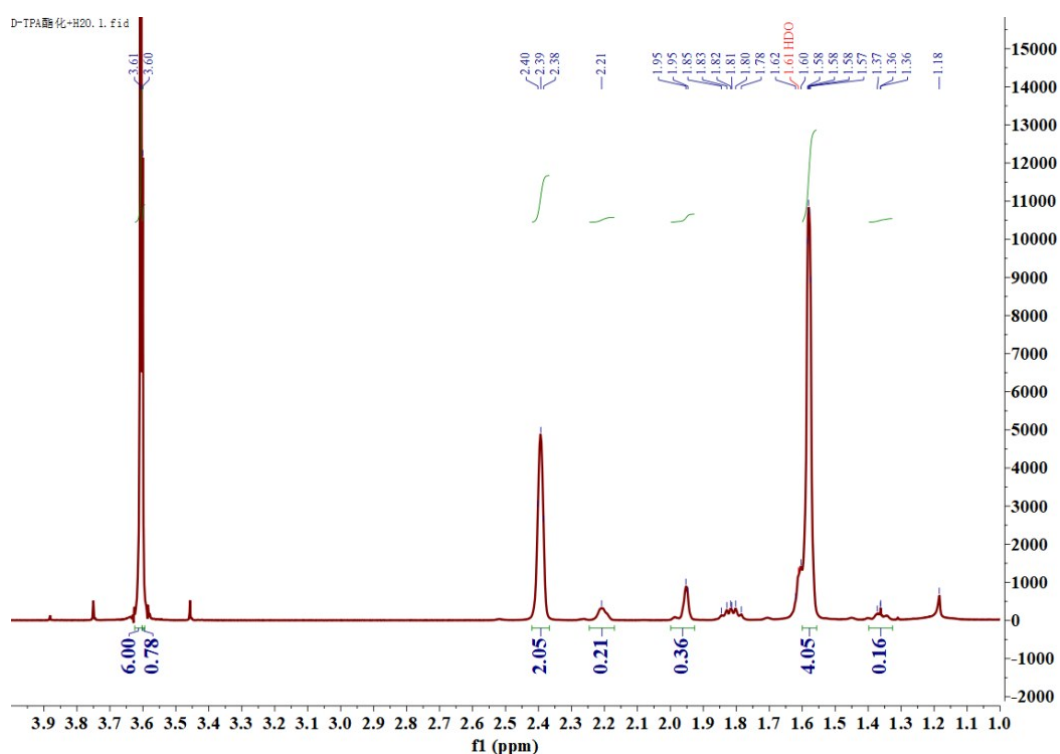

**Fig. S8.**  $^1\text{H}$  NMR spectrum of product (*p*-phthalic acid- $\text{d}_4$  was hydrogenated in  $\text{H}_2\text{O}$  following by esterifying to dimethyl 1, 4-cyclohexanedicarboxylate).  $\text{CDCl}_3$  was used to dissolve the product.

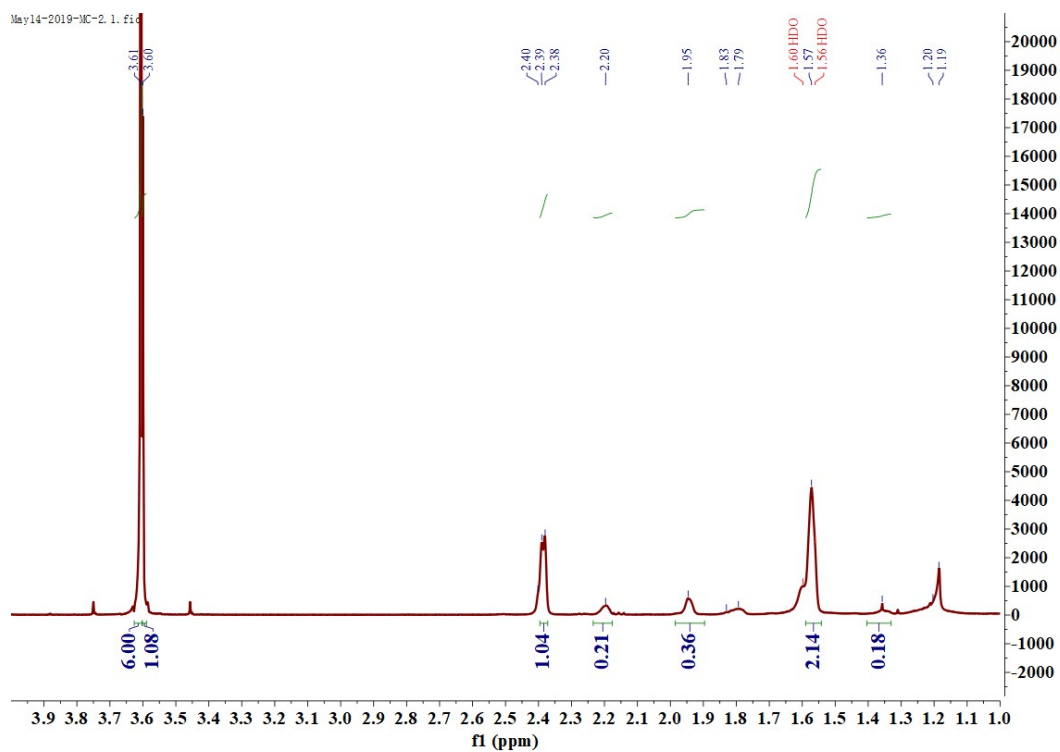

**Fig. S9.**  $^1\text{H}$  NMR spectrum of product (*p*-phthalic acid- $\text{d}_4$  was hydrogenated in  $\text{D}_2\text{O}$  following by esterifying to dimethyl 1, 4-cyclohexanedicarboxylate).  $\text{CDCl}_3$  was used to dissolve the product.
